# Supplementary material for: Cobalt-promoted Zn encapsulation within silicalite-1 for oxidative propane dehydrogenation with CO2 by microwave catalysis at low temperature
Source: Royal Society of Chemistry journal article supplement (doi:10.1039/d4qi01560f), 2024-01-01
Supplement: d4qi01560f1.pdf [file d4qi01560f1.pdf]

1  
2  
3  
4  
5  
6  
7  
8  
9  
10  
11  
12  
13  
14  
15  
16  
17  
18  
19  
20  
21  
22  
23  
24

## Supplementary Information

### **Cobalt-promoted Zn encapsulation within Silicalite-1 for oxidative propane dehydrogenation with CO<sub>2</sub> by microwave catalysis at low temperature**

Fangui Nie<sup>a</sup>, Hongyang Sun<sup>a</sup>, Tianyi Li<sup>a</sup>, Zhimin You<sup>b\*</sup>, Jicheng Zhou<sup>a,c</sup>, Wentao Xu<sup>a,c,\*</sup>

a. Key Laboratory of Green Catalysis and Chemical Reaction Engineering of Hunan Province, School of Chemical Engineering, Xiangtan University, Xiangtan 411105, P.R.China

b. School of Environment and Resource, Xiangtan University, Xiangtan 411105, P.R.China

c. National and Local United Engineering Research Center for Chemical Process Simulation and Intensification, Xiangtan University, Xiangtan 411105, P.R.China

\*Corresponding Author

Tel/fax: +86-731 58298173.

E-mail: [wentaoxu@xtu.edu.cn](mailto:wentaoxu@xtu.edu.cn) (W. Xu); [yzmxtu@163.com](mailto:yzmxtu@163.com) (Z. You)

1

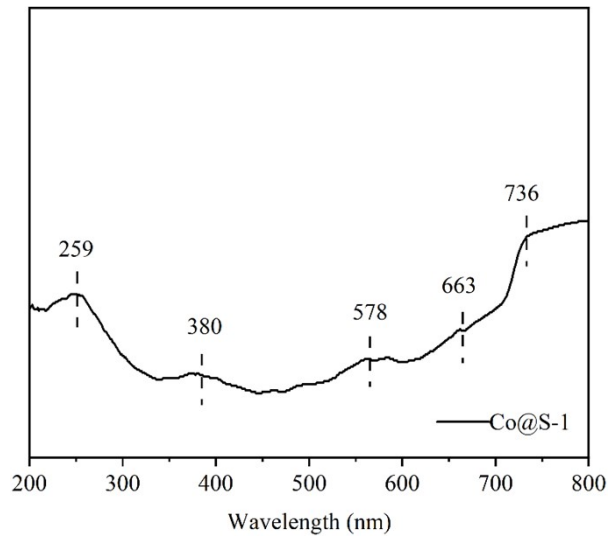

2

3

4

5

**Figure S1.** Raman spectrum of Co@S-1 catalyst.

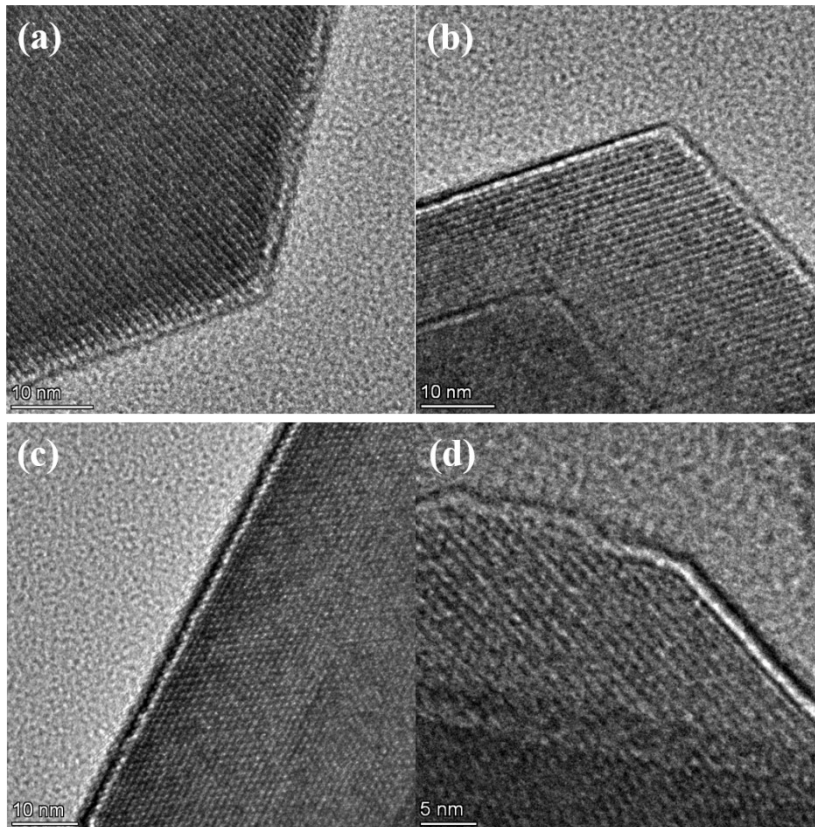

6

7

8

**Figure S2.** HRTEM images of  $Zn_8Co_1@S-1$  catalyst.

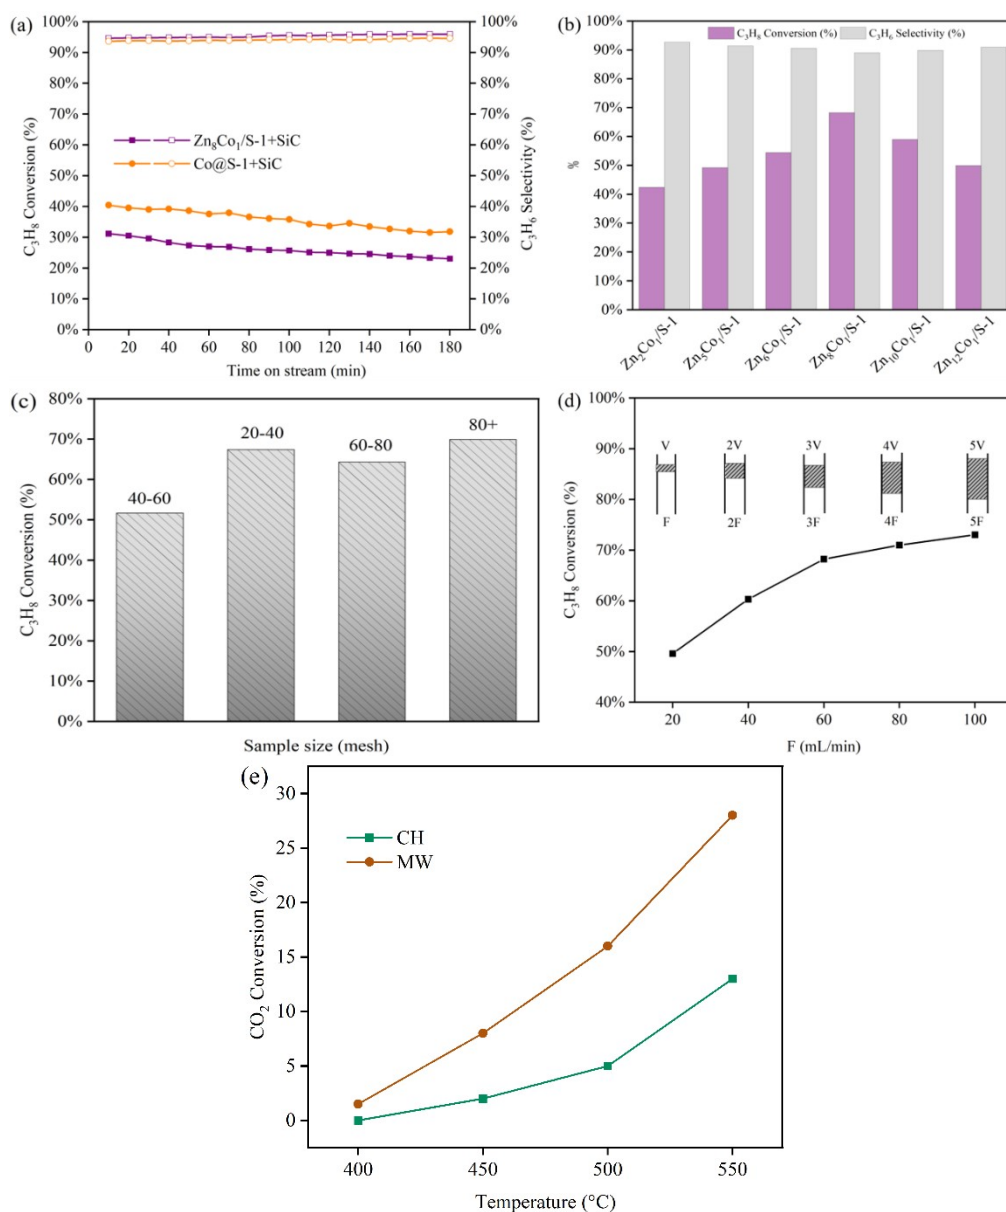

1

2

3 **Figure S3.** Performance of propane dehydrogenation under microwave. (a) Zn<sub>8</sub>Co<sub>1</sub>/S-

4 1+SiC and Co@S-1+SiC microwave catalysts; (b) effect of different amounts of Zn

5 and Co substances on catalytic activity; (c) effect of diffusion within the Zn<sub>8</sub>Co<sub>1</sub>/S-

6 1+SiC microwave catalyst; (d) effect of diffusion outside the Zn<sub>8</sub>Co<sub>1</sub>/S-1+SiC

7 microwave catalyst; (e) CO<sub>2</sub> conversion over Zn<sub>8</sub>Co<sub>1</sub>@S-1 catalysts at MW and CH,

8 respectively **Reaction conditions:** 0.5 g catalyst+3 g SiC, 400-550 °C, 20-80+ mesh,

9 20~100 mL/min total flow of 10 vol% C<sub>3</sub>H<sub>8</sub> and 20 vol% CO<sub>2</sub> in Ar for CO<sub>2</sub>-ODHP,

10 microwave power: 450-800W

11

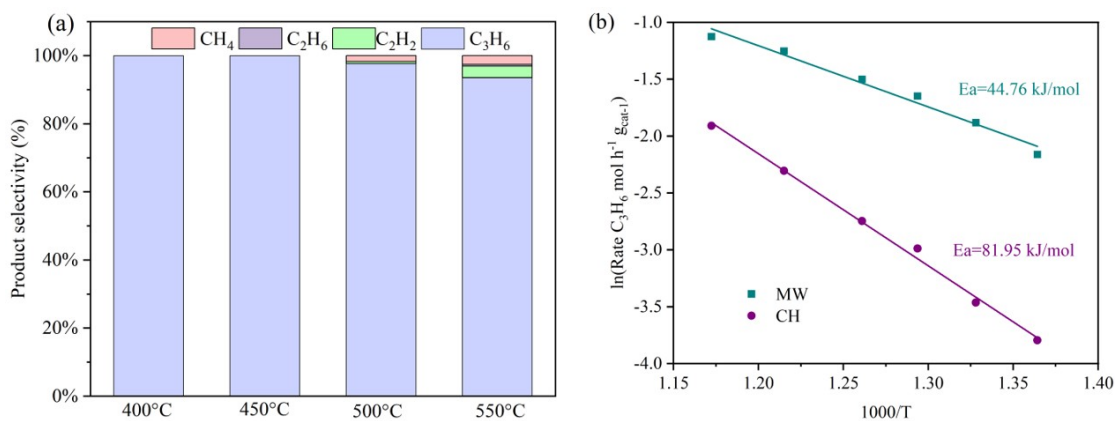

1

2 **Figure S4.** (a) Product distribution of  $\text{Zn}_8\text{Co}_1@\text{S-1}$  catalyst at different temperatures  
 3 under  $\text{CH}$ ; (b) Linear fitting curves of  $\text{CO}_2$ -ODHP for catalysts under MW and  $\text{CH}$ .

4 **Reaction conditions:** 0.5 g catalyst+3 g  $\text{SiC}$ , 400-580 °C, 40-60 mesh, 60 mL/min  
 5 total flow of 10 vol%  $\text{C}_3\text{H}_8$  and 20 vol%  $\text{CO}_2$  in Ar for  $\text{CO}_2$ -ODHP, microwave power:

6

450-800W

7

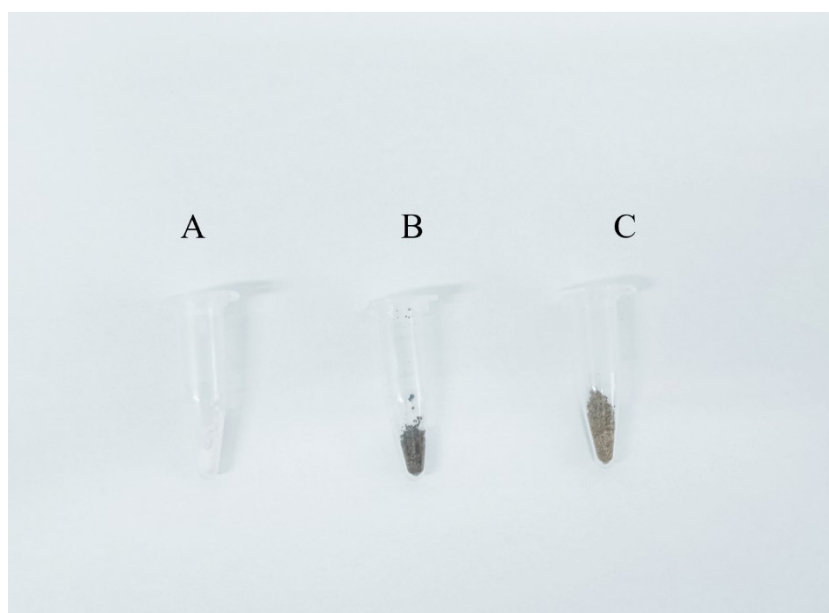

8

9 **Figure S5.** Photograph of  $\text{Zn}_8\text{Co}_1@\text{S-1}$  catalyst. (a) Fresh catalyst; (b) Spent catalyst  
 10 after PDH reaction; (c) Spent catalyst after  $\text{CO}_2$ -ODHP reaction.
